# Supplementary material for: Metabolic signatures differentiate ovarian from colon cancer cell lines
Source: PubMed Central journal article supplement (PMC4499939; doi:10.1186/s12967-015-0576-z), 2015-07-14

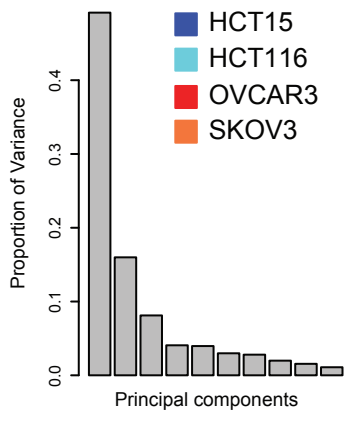

- HCT15
- HCT116
- OVCAR3
- SKOV3

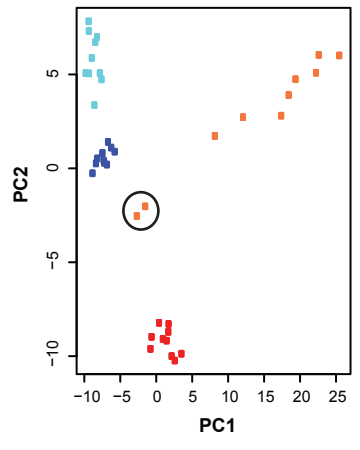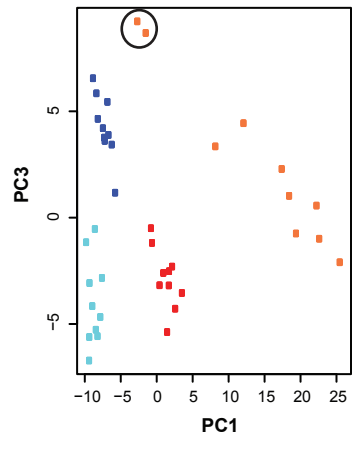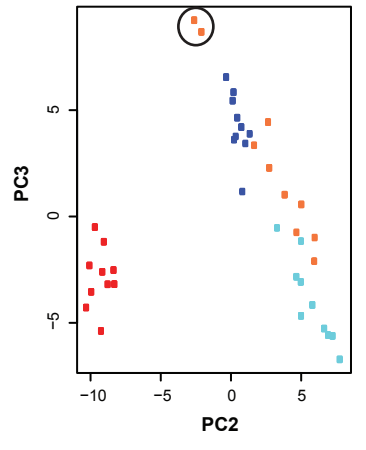

Supplement: 12967_2015_576_MOESM1_ESM.pdf [file 12967_2015_576_MOESM1_ESM.pdf]
